# Supplementary material
Source: PubMed Central journal article supplement (PMC3806541)
Supplement: supp_mct212_mct212supp.pdf [file supp_mct212_mct212supp.pdf]

## SUPPLEMENTARY DATA

TABLE S1. The primers for semiquantitative RT-PCR of *OsPINs*, *OsAUX1* and *OsAXR4* genes.

| Gene           | Primers sequences (5' to 3')                             | Product length (bp) |
|----------------|----------------------------------------------------------|---------------------|
| <i>OsACT</i>   | pF: GGAACTGGTATGGTCAAGGC<br>pR: AGTCTCATGGATAACCGCAG     | 750                 |
| <i>OsPIN1a</i> | pF: TCATCTGGTCGCTCGTCTGC<br>pR: CGAACGTCGCCACCTTGTTTC    | 171                 |
| <i>OsPIN1b</i> | pF: TGCACCCTAGCATTCTCAGCA<br>pR: CCCTCCTCCCAAATTCTACTT   | 246                 |
| <i>OsPIN1c</i> | pF: TCGCACGGGACGCAGTCA<br>pR: CCCGTCCTTCTCGTTCTTGTTTC    | 402                 |
| <i>OsPIN2</i>  | pF: ATATTGTCAGATGCAGGGCTAG<br>pR: TCCTACTTGATCTCATTTC    | 652                 |
| <i>OsPIN5a</i> | pF: TGGCGGATCTTCACGAGG<br>pR: CCGACGACAAGCGAGTTG         | 266                 |
| <i>OsPIN5b</i> | pF: GGGCAGCAGGAGAGGGTGATAG<br>pR: GAATCGGCAGAGAGATCAATGT | 259                 |
| <i>OsPIN9</i>  | pF: GATACAAGATAGCGTCGTTCTC<br>pR: ATGATGTCTGCGTGGACCT    | 187                 |
| <i>OsAUX1</i>  | pF: AAGCCACCGTTCTTCTCTGC<br>pR: CATGCCCTCTTCTTCTTCTACC   | 425                 |
| <i>OsAXR4</i>  | pF: CAGCAGCCTTTCTTCTCAGTT<br>pR: GGTGGTGGTGGGTTTGGA      | 391                 |
